# Supplementary material
Source: publisher site journal article supplement (https://content.cld.iop.org/journals/1748-9326/18/1/014007/revision3/erlaca8bdsupp1.pdf)
Supplement: Supplementary file 1 [file erlaca8bdsupp1.pdf]

## Supplement

Table S1. SNOTEL station metadata and snow water equivalent change ( $\Delta$ SWE) values where record weekly snow melt occurred throughout April 2021 (shown in Figure 2b of manuscript).

| April 1-7         |           |          |               |             |                   |                           |
|-------------------|-----------|----------|---------------|-------------|-------------------|---------------------------|
| Name              | SNOTEL ID | State    | Elevation (m) | POR (years) | $\Delta$ SWE (mm) | $\Delta$ SWE ( $\sigma$ ) |
| Dollarhide Summit | 450       | Idaho    | 2566          | 40          | -87               | -3.73                     |
| Snider Basin      | 765       | Wyoming  | 2457          | 40          | -64               | -3.39                     |
| East Rim Divide   | 460       | Wyoming  | 2417          | 36          | -76               | -3.24                     |
| Copper Bottom     | 413       | Montana  | 1585          | 43          | -97               | -3.17                     |
| Sylvan Road       | 807       | Wyoming  | 2170          | 34          | -112              | -3.06                     |
| Apishapa          | 303       | Colorado | 3048          | 41          | -139              | -3.02                     |
| Rocky Boy         | 917       | Montana  | 1433          | 54          | -107              | -3.01                     |
| Wolf Creek Summit | 874       | Colorado | 3353          | 35          | -94               | -2.90                     |
| Moose Creek       | 638       | Idaho    | 1890          | 40          | -78               | -2.84                     |
| Slumgullion       | 762       | Colorado | 3523          | 41          | -33               | -2.76                     |
| Schweitzer Basin  | 738       | Idaho    | 1856          | 40          | -91               | -2.73                     |
| Skalkaho Summit   | 760       | Montana  | 2210          | 45          | -46               | -2.72                     |
| Calvert Creek     | 381       | Montana  | 1960          | 46          | -91               | -2.65                     |
| Lubrecht Flume    | 604       | Montana  | 1426          | 51          | -99               | -2.59                     |
| Currant Creek     | 432       | Utah     | 2412          | 43          | -143              | -2.59                     |
| Emery Creek       | 469       | Montana  | 1326          | 45          | -84               | -2.53                     |
| Bear Canyon       | 320       | Idaho    | 2408          | 41          | -51               | -2.52                     |
| Kimberly Mine     | 557       | Utah     | 2774          | 41          | -114              | -2.50                     |
| Medano Pass       | 914       | Colorado | 2941          | 26          | -145              | -2.43                     |
| Banner Summit     | 312       | Idaho    | 2146          | 41          | -84               | -2.42                     |
| Tizer Basin       | 893       | Montana  | 2097          | 33          | -61               | -2.42                     |

|                    |      |            |      |    |      |       |
|--------------------|------|------------|------|----|------|-------|
| Willow Creek       | 868  | Wyoming    | 2463 | 40 | -99  | -2.39 |
| Grouse Camp        | 507  | Washington | 1643 | 39 | -114 | -2.34 |
| Brooklyn Lake      | 367  | Wyoming    | 3121 | 40 | -28  | -2.33 |
| Black Pine         | 349  | Montana    | 2198 | 56 | -36  | -2.33 |
| Gallegos Peak      | 491  | New Mexico | 2987 | 41 | -130 | -2.33 |
| Brundage Reservoir | 370  | Idaho      | 1905 | 35 | -94  | -2.29 |
| Bug Lake           | 374  | Utah       | 2434 | 43 | -61  | -2.28 |
| Mc Clure Pass      | 618  | Colorado   | 2670 | 41 | -96  | -2.22 |
| Howell Canyon      | 534  | Idaho      | 2432 | 41 | -91  | -2.16 |
| Stillwater Creek   | 793  | Colorado   | 2658 | 36 | -112 | -2.15 |
| Independence Pass  | 542  | Colorado   | 3231 | 41 | -43  | -2.13 |
| Sherwin            | 752  | Idaho      | 975  | 40 | -107 | -2.12 |
| Divide Peak        | 449  | Wyoming    | 2707 | 41 | -59  | -2.11 |
| Big Flat           | 339  | Utah       | 3154 | 43 | -20  | -2.10 |
| Kirwin             | 560  | Wyoming    | 2911 | 41 | -18  | -2.08 |
| Red River Pass #2  | 715  | New Mexico | 3002 | 42 | -124 | -2.07 |
| Frohner Meadow     | 487  | Montana    | 1975 | 49 | -41  | -2.03 |
| Overland Res.      | 675  | Colorado   | 2999 | 32 | -61  | -2.01 |
| Steel Creek Park   | 790  | Utah       | 3096 | 43 | -15  | -2.01 |
| Burro Mountain     | 378  | Colorado   | 2865 | 41 | -67  | -2.00 |
| Big Creek Summit   | 338  | Idaho      | 1999 | 40 | -56  | -1.98 |
| North Costilla     | 665  | New Mexico | 3231 | 42 | -94  | -1.98 |
| Middle Fork Camp   | 1014 | Colorado   | 2725 | 20 | -61  | -1.97 |
| Triple Peak        | 831  | Wyoming    | 2591 | 36 | -66  | -1.94 |
| Slug Creek Divide  | 761  | Idaho      | 2202 | 41 | -107 | -1.94 |

|                   |     |            |      |    |      |       |
|-------------------|-----|------------|------|----|------|-------|
| Diamond Peak      | 443 | Nevada     | 2444 | 38 | -122 | -1.91 |
| Brown Duck        | 368 | Utah       | 3223 | 43 | -26  | -1.84 |
| Garfield R.S.     | 492 | Idaho      | 1999 | 41 | -107 | -1.84 |
| Ripple Creek      | 717 | Colorado   | 3152 | 35 | -46  | -1.81 |
| Roach             | 718 | Colorado   | 2957 | 41 | -33  | -1.79 |
| Indian Creek      | 544 | Wyoming    | 2873 | 40 | -31  | -1.79 |
| Bear Lake         | 322 | Colorado   | 2896 | 41 | -25  | -1.79 |
| Agua Canyon       | 907 | Utah       | 2713 | 27 | -104 | -1.76 |
| Schwartz Lake     | 915 | Idaho      | 2630 | 26 | -23  | -1.76 |
| Peterson Meadows  | 930 | Montana    | 2195 | 51 | -12  | -1.76 |
| Copper Mountain   | 415 | Colorado   | 3216 | 43 | -18  | -1.76 |
| Evening Star      | 472 | Wyoming    | 2804 | 39 | -18  | -1.74 |
| Olallie Meadows   | 672 | Washington | 1228 | 39 |      | -1.74 |
| Pickle Keg        | 691 | Utah       | 2749 | 43 | -84  | -1.70 |
| Rabbit Ears       | 709 | Colorado   | 2865 | 35 | -46  | -1.69 |
| Vernon Creek      | 844 | Utah       | 2256 | 43 | -117 | -1.67 |
| Mill Creek Summit | 627 | Idaho      | 2682 | 40 | -20  | -1.63 |
| Nevada Ridge      | 903 | Montana    | 2140 | 27 | -18  | -1.60 |
| Sandstone RS      | 732 | Wyoming    | 2484 | 36 | -88  | -1.56 |
| Rubicon #2        | 724 | California | 2322 | 41 | -87  | -1.54 |
| Grave Springs     | 501 | Wyoming    | 2606 | 29 | -15  | -1.51 |
| Tower             | 825 | Colorado   | 3200 | 42 | -18  | -1.50 |
| Loveland Basin    | 602 | Colorado   | 3475 | 29 | 0    | -1.48 |
| Granite Creek     | 497 | Wyoming    | 2063 | 34 | -51  | -1.42 |
| Rough And Tumble  | 939 | Colorado   | 3158 | 23 | -8   | -1.37 |
| Leavitt Lake      | 574 | California | 2927 | 32 | -21  | -1.22 |
| Echo Lake         | 936 | Colorado   | 3231 | 23 | -10  | -1.19 |
| Lookout Mountain  | 595 | New Mexico | 2591 | 41 | 0    | -0.16 |

|                     |      |            |      |    |      |       |
|---------------------|------|------------|------|----|------|-------|
|                     |      |            |      |    |      |       |
| April 8-14          |      |            |      |    |      |       |
| Jones Pass          | 970  | Colorado   | 3170 | 22 | -68  | -2.86 |
| Vail Mountain       | 842  | Colorado   | 3139 | 43 | -51  | -2.82 |
| Diamond Lake        | 442  | Oregon     | 1609 | 40 | -196 | -2.67 |
| South Colony        | 773  | Colorado   | 3292 | 30 | -61  | -2.63 |
| Stump Lakes         | 797  | Colorado   | 3414 | 35 | -58  | -2.61 |
| Independence Camp   | 539  | California | 2128 | 43 | -191 | -2.54 |
| Bateman             | 316  | New Mexico | 2835 | 42 | -114 | -2.37 |
| Clayton Springs     | 983  | Utah       | 3063 | 21 | -109 | -2.12 |
| Snowslide Canyon    | 927  | Arizona    | 2966 | 24 | -137 | -2.11 |
| Tolby               | 934  | New Mexico | 3103 | 23 | -122 | -2.09 |
| Vacas Locas         | 1017 | New Mexico | 2836 | 20 | -124 | -2.01 |
| Wesner Springs      | 854  | New Mexico | 3389 | 32 | -74  | -1.98 |
| Spring Creek Divide | 779  | Wyoming    | 2743 | 41 | -18  | -1.96 |
| Camp Jackson        | 383  | Utah       | 2700 | 36 | -122 | -1.81 |
| Ute Creek           | 1005 | Colorado   | 3246 | 21 | -63  | -1.56 |
| Independence Lake   | 541  | California | 2541 | 43 | -38  | -1.45 |
| Gerber Reservoir    | 945  | Oregon     | 1490 | 23 | 0    | -0.31 |
|                     |      |            |      |    |      |       |
| April 15-21         |      |            |      |    |      |       |
| Spirit Lake         | 777  | Washington | 1073 | 37 | -259 | -3.82 |
| Corral Pass         | 418  | Washington | 1768 | 39 | -150 | -3.45 |
| King Mountain       | 558  | Oregon     | 1323 | 41 | -130 | -3.34 |
| Mores Creek Summit  | 637  | Idaho      | 1859 | 40 | -168 | -2.99 |
| Quartz Peak         | 707  | Washington | 1433 | 34 | -206 | -2.95 |
| Dungeness           | 943  | Washington | 1222 | 22 | -171 | -2.92 |

|                     |      |            |      |    |      |       |
|---------------------|------|------------|------|----|------|-------|
| Santiam Jct.        | 733  | Oregon     | 1140 | 43 | -259 | -2.80 |
| Three Creeks Meadow | 815  | Oregon     | 1734 | 41 | -163 | -2.73 |
| Spruce Springs      | 984  | Washington | 1737 | 21 | -142 | -2.66 |
| Salmon Meadows      | 728  | Washington | 1359 | 39 | -153 | -2.63 |
| Bowman Springs      | 362  | Oregon     | 1381 | 43 | -203 | -2.54 |
| Annie Springs       | 1000 | Oregon     | 1832 | 21 | -97  | -2.53 |
| Derr.               | 440  | Oregon     | 1783 | 41 | -191 | -2.51 |
| Lost Horse          | 599  | Washington | 1561 | 31 | -145 | -2.50 |
| Park Creek Ridge    | 681  | Washington | 1402 | 43 | -236 | -2.49 |
| Green Lake          | 502  | Washington | 1804 | 39 | -107 | -2.48 |
| South Fork Bull Run | 925  | Oregon     | 820  | 24 | -140 | -2.47 |
| Alpine Meadows      | 908  | Washington | 1067 | 27 | -142 | -2.45 |
| Potato Hill         | 702  | Washington | 1375 | 38 | -150 | -2.45 |
| Moscow Mountain     | 989  | Idaho      | 1433 | 21 | -178 | -2.43 |
| Bogus Basin         | 978  | Idaho      | 1932 | 22 | -129 | -2.40 |
| Touchet             | 824  | Washington | 1686 | 39 | -198 | -2.38 |
| Bumping Ridge       | 375  | Washington | 1405 | 40 | -104 | -2.33 |
| Peavine Ridge       | 687  | Oregon     | 1042 | 40 | -191 | -2.29 |
| Elbow Lake          | 910  | Washington | 927  | 26 | -198 | -2.28 |
| Pope Ridge          | 699  | Washington | 1094 | 40 | -178 | -2.28 |
| Shanghi Summit      | 747  | Idaho      | 1402 | 39 | -206 | -2.23 |
| Buckskin Lower      | 373  | Nevada     | 2112 | 41 | -140 | -2.22 |
| Mud Ridge           | 655  | Oregon     | 1241 | 43 | -181 | -2.16 |
| Hand Creek          | 510  | Montana    | 1535 | 45 | -76  | -2.15 |
| Mckenzie            | 619  | Oregon     | 1454 | 40 | -191 | -2.13 |
| Beaver Pass         | 990  | Washington | 1106 | 20 | -81  | -2.13 |

|                  |     |            |      |    |      |       |
|------------------|-----|------------|------|----|------|-------|
| Clear Creek #2   | 400 | Utah       | 2389 | 43 | -168 | -2.10 |
| Snow Mountain    | 767 | Oregon     | 1899 | 43 | -150 | -2.08 |
| Gold Center      | 494 | Oregon     | 1649 | 41 | -155 | -2.05 |
| Mica Creek       | 623 | Idaho      | 1375 | 31 | -138 | -2.03 |
| Cedar Pass       | 391 | California | 2143 | 43 | -178 | -2.02 |
| Blewett Pass     | 352 | Washington | 1292 | 40 | -173 | -1.93 |
| Blue Lakes       | 356 | California | 2459 | 41 | -94  | -1.89 |
| Swamp Creek      | 975 | Washington | 1198 | 22 | -134 | -1.85 |
| Clackamas Lake   | 398 | Oregon     | 1036 | 41 | -157 | -1.81 |
| Mount Gardner    | 898 | Washington | 890  | 28 | -145 | -1.81 |
| Wilson Creek     | 871 | Idaho      | 2170 | 31 | -138 | -1.76 |
| Monitor Pass     | 633 | California | 2532 | 31 | -130 | -1.75 |
| Ward Creek #3    | 848 | California | 2056 | 42 | -188 | -1.72 |
| Sheldon          | 750 | Nevada     | 1788 | 32 | 0    | -0.25 |
|                  |     |            |      |    |      |       |
| April 22-28      |     |            |      |    |      |       |
| Pigtail Peak     | 692 | Washington | 1768 | 40 | -208 | -3.06 |
| Santa Fe         | 922 | New Mexico | 3488 | 25 | -104 | -2.48 |
| Stevens Pass     | 791 | Washington | 1204 | 41 | -216 | -2.47 |
| Lyman Lake       | 606 | Washington | 1823 | 39 | -112 | -2.28 |
| Trapper Lake     | 827 | Colorado   | 2957 | 36 | -125 | -1.89 |
| Kendall R.S.     | 555 | Wyoming    | 2359 | 36 | -127 | -1.78 |
| Donkey Reservoir | 452 | Utah       | 2987 | 36 | -122 | -1.77 |
| Crowder Flat     | 977 | California | 1576 | 22 | 0    | -0.22 |
| Happy Jack       | 969 | Arizona    | 2326 | 22 | 0    | -0.22 |
| Coronado Trail   | 416 | Arizona    | 2560 | 41 | 0    | -0.16 |

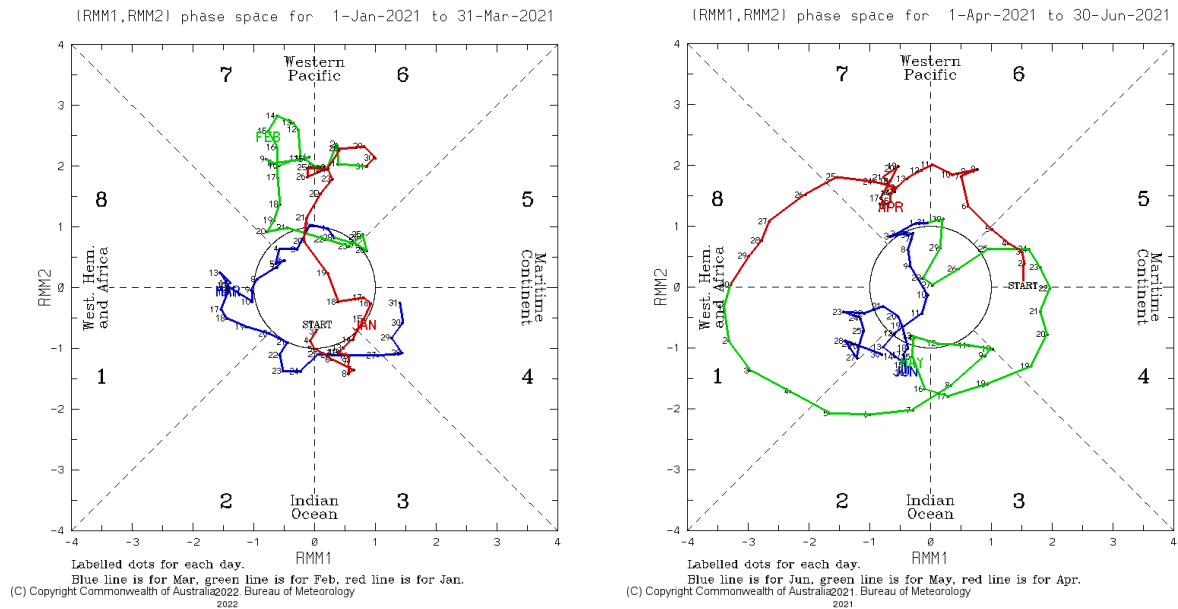

Figure S1. MJO phase diagrams for (left) January-March 2021 and (right) April-June 2021 showing the magnitude and location of the MJO. Main manuscript text describes March 2021 (blue line on left figure) and April 2021 (red line on right figure) MJO. Figure obtained from <http://www.bom.gov.au/climate/mjo/> with permission under the [Creative Commons Attribution 4.0 International License](https://creativecommons.org/licenses/by/4.0/).
